# Supplementary material for: A hybrid composite of hydroxyapatite and Ca–Al layered double hydroxide supported Au nanoparticles for highly efficient base-free aerobic oxidation of glucose
Source: Royal Society of Chemistry journal article supplement (doi:10.1039/c9dt00985j), 2019-01-01
Supplement: c9dt00985j1.pdf [file c9dt00985j1.pdf]

## Supporting Information

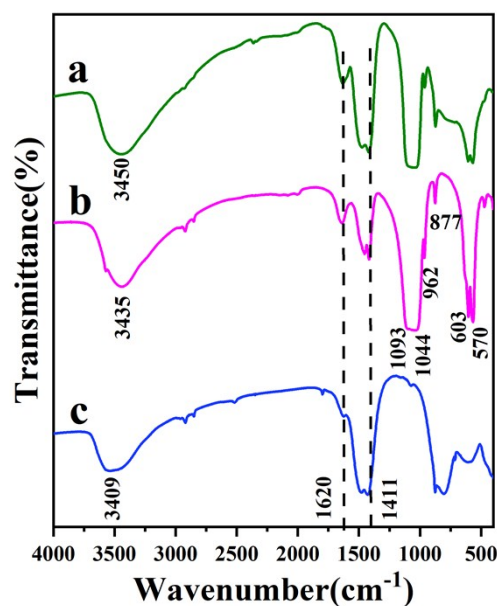

**Fig.S1** FT-IR spectra of Au/HAP-LDH (a), Au/HAP (b) and Au/LDH(c) samples with the Au loading amount of 0.2 wt%.

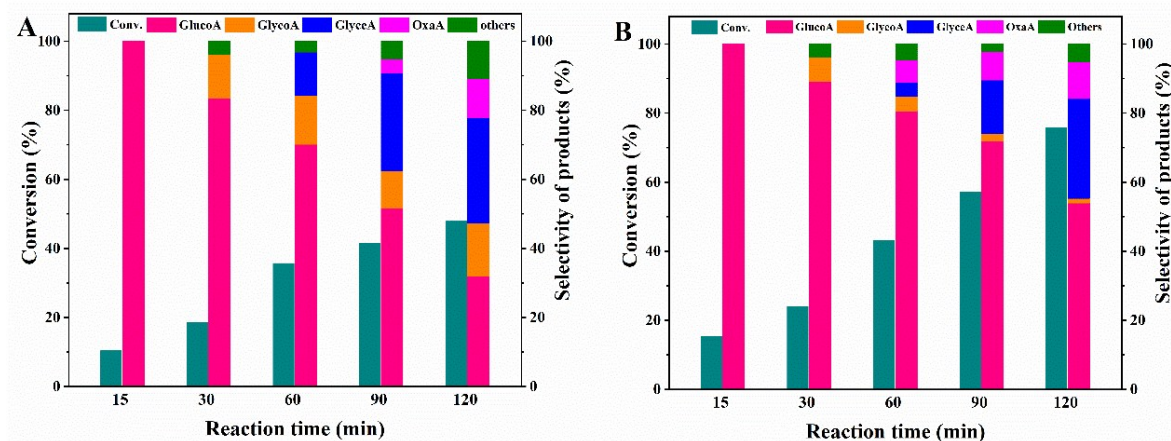

**Fig.S2** Change in the conversion and selectivity in the oxidation of glucose with the reaction time over the Au/HAP (A) and Au/LDH (B) catalysts with the Au loading amount of 0.2 wt%. Reaction conditions: 110 °C; oxygen partial pressure, 0.5 MPa.

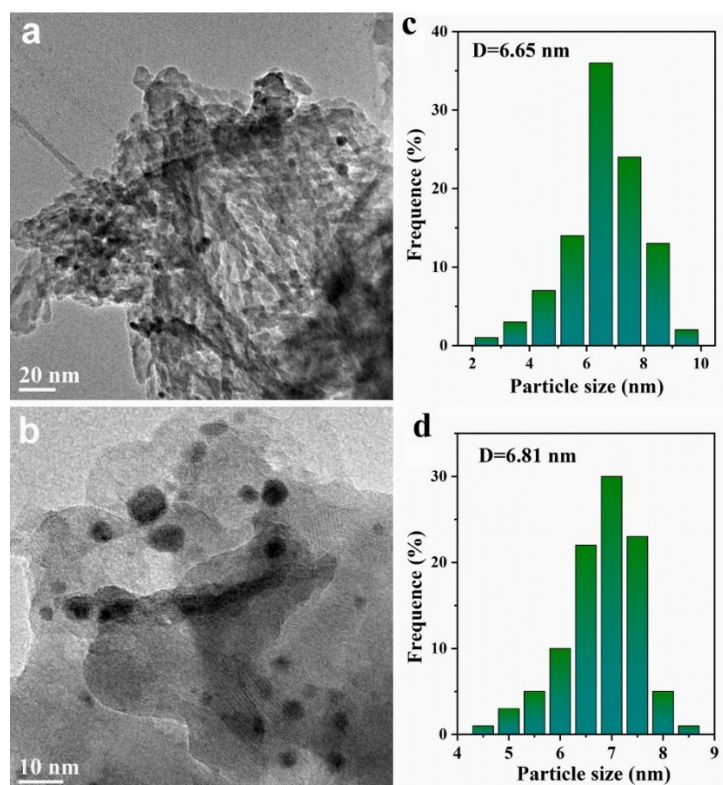

**Fig.S3** TEM images and histograms of the particle size distributions of Au/HAP-LDH samples with different Au loading amounts of 0.5 wt % (a and c) and 2.0 wt % (b and d).

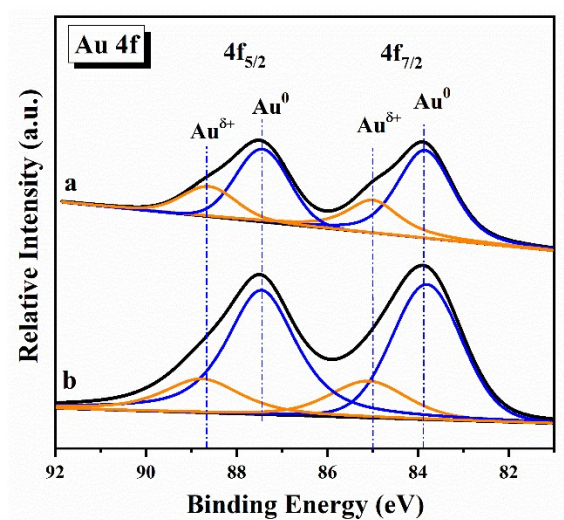

**Fig.S4** XPS of Au 4f regions of supported Au/HAP-LDH samples with different Au loading amounts of 0.5 wt% (a) 2.0 wt % (b).

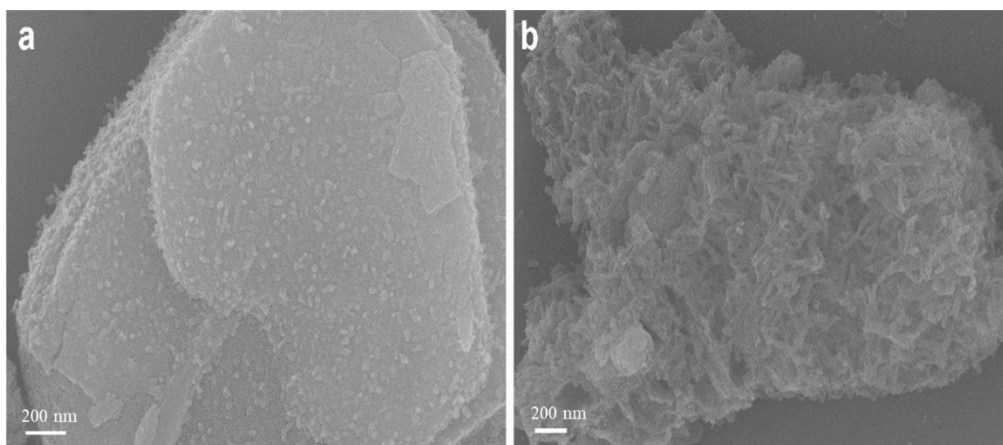

**Fig.S5** SEM images of Au/HAP-LDH samples with the Au loading amount of 0.2 wt% and different Ca/P molar ratios of 1.8 (a) and 0.9 (b).

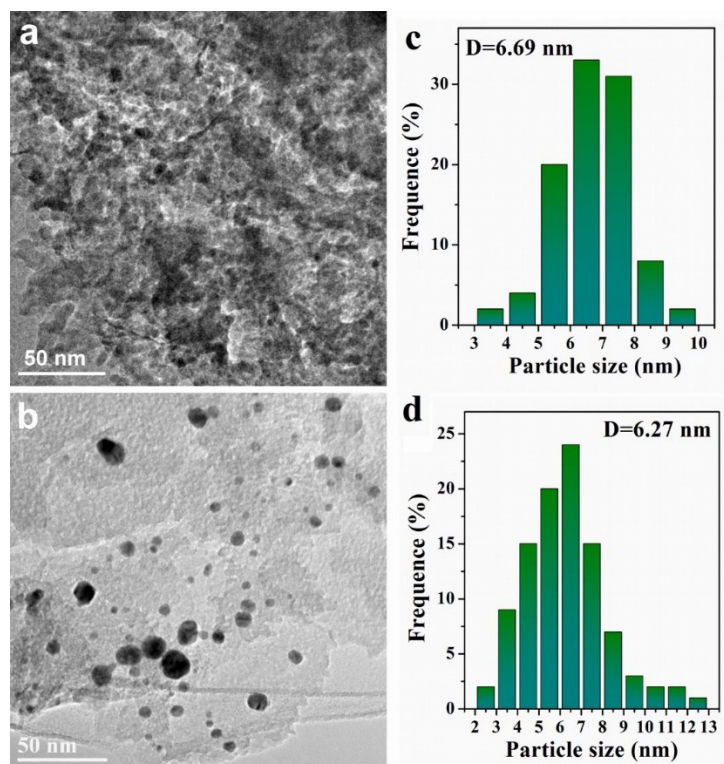

**Fig.S6** TEM images and histograms of the particle size distributions of spent Au/HAP-LDH (a and c) and spent Au/LDH (b and d) with the Au loading amount of 0.2 wt% after four consecutive cycles.

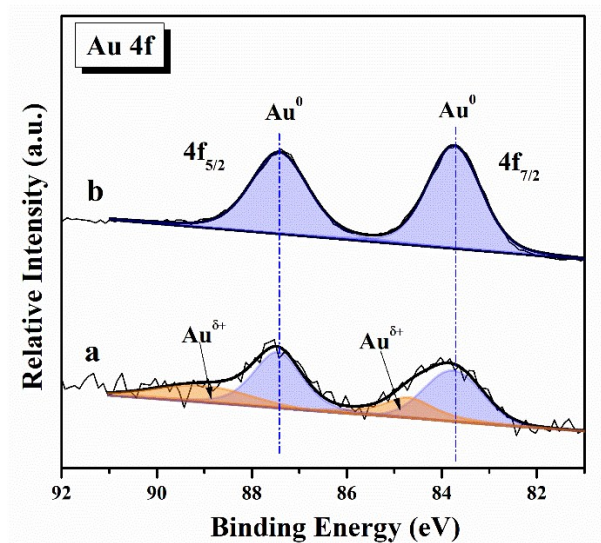

**Fig.S7** XPS of Au 4f region for Au/HAP-LDH (a) and Au/LDH (b) catalysts with the Au loading amount of 0.2 wt% after four consecutive cycles.

**Table S1** Catalytic performances of other reported mono-metallic Au-based catalysts for glucose oxidation to produce GlucoA using molecular oxygen as the oxidant.

| Catalyst                   | Time (min) | Temp. (°C) | O <sub>2</sub> flow (ml/min) | Base | Glu/Au (mol/mol) | Conv. (%) | Selectivity (%) | TOF (h <sup>-1</sup> ) | Ref.      |
|----------------------------|------------|------------|------------------------------|------|------------------|-----------|-----------------|------------------------|-----------|
| 1%-Au/AC                   | n.a.       | 50         | 20                           | NaOH | 1000:1           | n.a       | 99              | 500                    | [66]      |
| 0.89% -Au/AC               | 20         | 50         | 20                           | NaOH | 1000:1           | 100       | >99             | 3000                   | [67]      |
| 0.5% -Au/AC                | 10         | 30         | 1000                         | NaOH | 1000:1           | 60        | n.a.            | 50120                  | [68]      |
| 1.38%- Au/AC               | 15         | 60         | 60                           | NaOH | 850:1            | 98        | 100             | 5440                   | [69]      |
| 0.45% -Au/TiO <sub>2</sub> | 170        | 40         | flow                         | KOH  | 2000:1           | 96        | 98              | n.a.                   | [70]      |
| 0.02%- Au/CeO <sub>2</sub> | 720        | 65         | 2.3 <sup>a</sup>             | none | 9000:1           | 43        | n.a.            | 3100                   | [9]       |
| 0.94%- Au/CMK-3            | 120        | 110        | 3 <sup>a</sup>               | none | 1000:1           | 92        | 87              | 17712                  | [10]      |
| 0.2%-Au/HAP-LDH            | 120        | 110        | 5 <sup>a</sup>               | none | 1000:1           | 99        | >99             | 20225                  | This work |

<sup>a</sup> Oxygen pressure in bar; <sup>b</sup> the molar ratio of glucose to Au species.
